# Supplementary material
Source: PubMed Central journal article supplement (PMC5533228)
Supplement: ASN.2016070711SupplementaryData.pdf [file ASN.2016070711SupplementaryData.pdf]

## SUPPLEMENTAL MATERIALS

## Long-term ET<sub>A</sub> receptor antagonism provides robust renal protection in humanized sickle cell disease mice

Malgorzata Kasztan,\* Brandon M. Fox,\* Joshua S. Speed,\* Carmen De Miguel,\* Eman Y. Gohar,\* Tim M. Townes,<sup>†</sup> Abdullah Kutlar,<sup>§</sup> Jennifer S. Pollock,\*<sup>¶</sup> and David M. Pollock\*<sup>¶</sup>

\*Cardio-Renal Physiology and Medicine, Department of Medicine, University of Alabama at Birmingham, Birmingham, Alabama; <sup>†</sup>Department of Biochemistry and Molecular Genetics, University of Alabama at Birmingham, Birmingham, Alabama; <sup>§</sup>Division of Hematology/Oncology, <sup>¶</sup>Department of Medicine, Medical College of Georgia, Augusta University, Augusta, Georgia

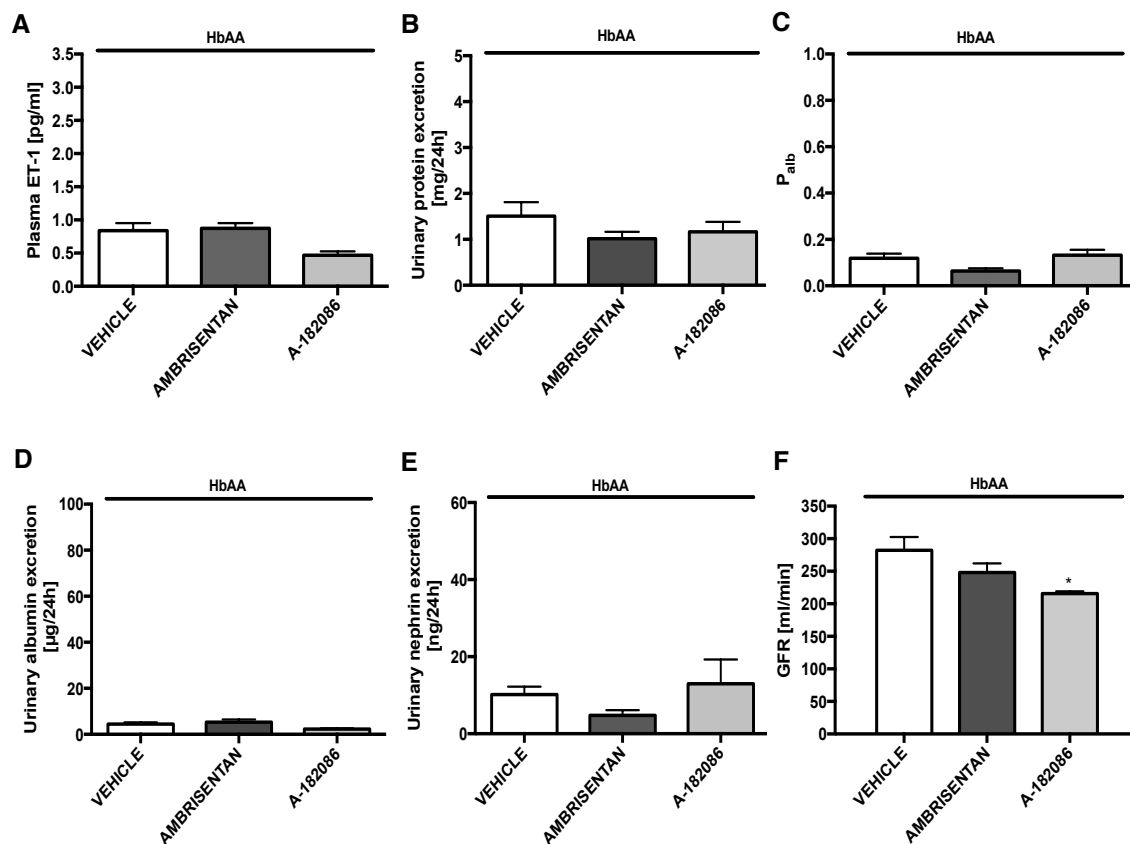

**Figure 1. Plasma ET-1, proteinuria, glomerular permeability to albumin ( $P_{alb}$ ), urinary excretion of markers of glomerular injury and glomerular filtration rate (GFR) in vehicle-treated or treated with 10-week treatment protocol (beginning at 4 weeks of age) with selective ET<sub>A</sub> antagonist, ambrisentan or combined ET<sub>A/B</sub> antagonist, A-182086, HbAA mice. Panel A depicts the average ET-1 in plasma after 10-week treatment protocol. Panel B depicts the average proteinuria after 10-week treatment protocol. Panel C depicts the average  $P_{alb}$  after 10-week treatment protocol. Panel D depicts the average urinary albumin excretion after 10-week treatment protocol. Panel E depicts the average urinary nephrin excretion after 10-week treatment protocol. Panel F depicts the average GFR after 10-week treatment protocol. Data are mean  $\pm$  S.E.M; n=6-9 in HbAA groups; \*p<0.05 versus vehicle-treated HbAA.**

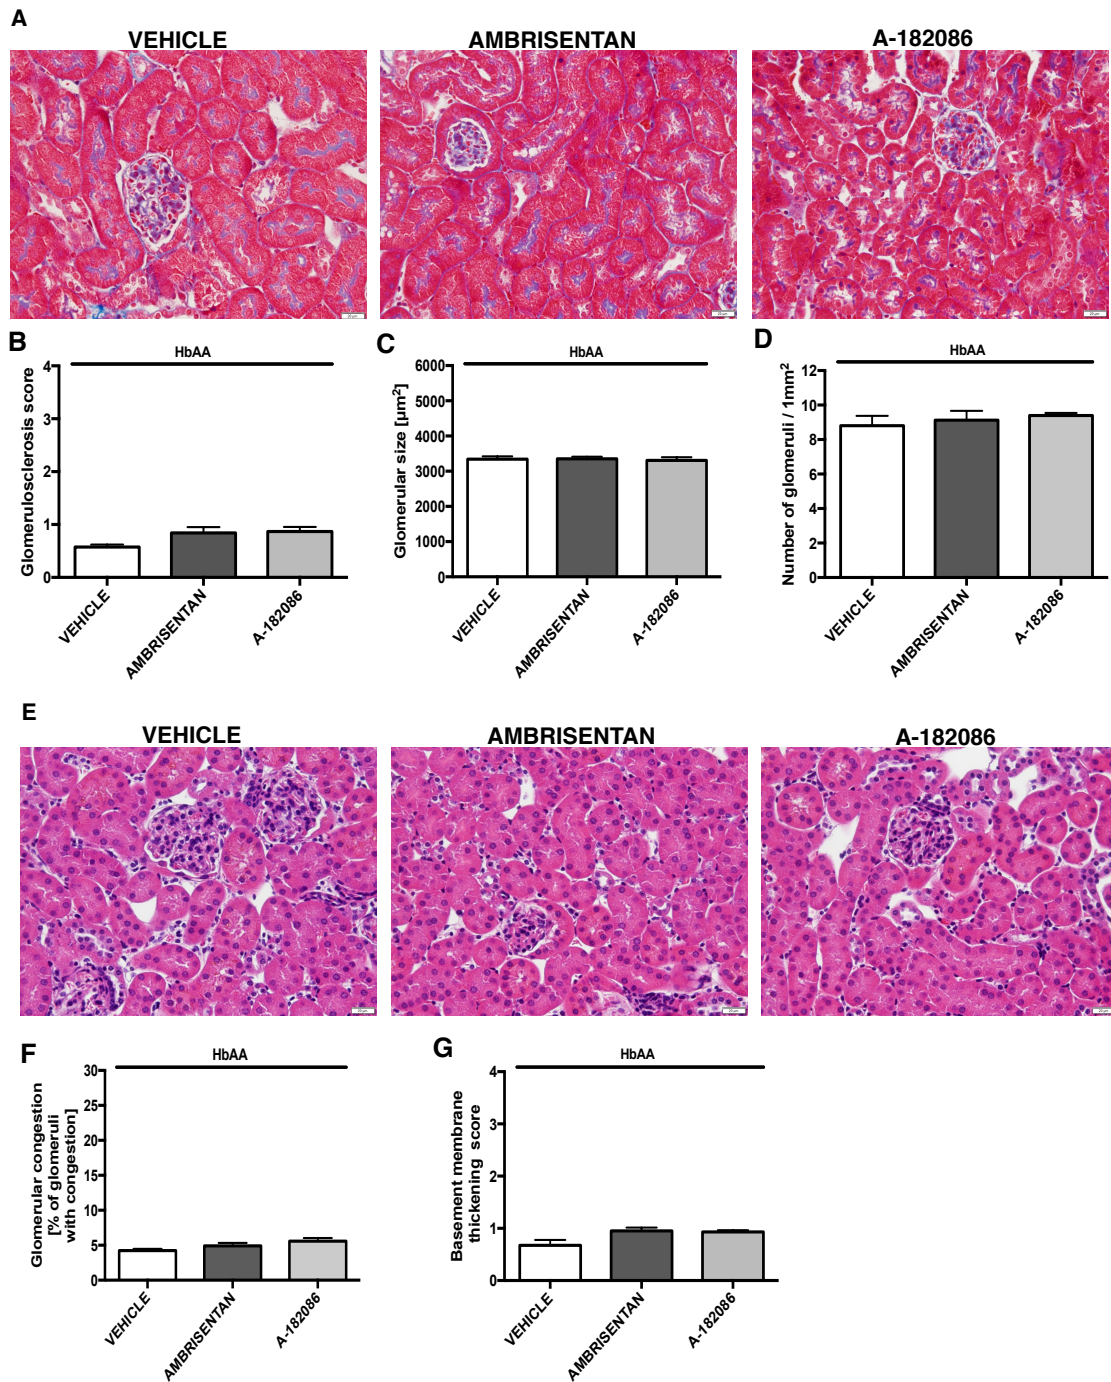

**Figure 2. Histological examination of the renal cortex in vehicle-treated or treated with 10-week treatment protocol (beginning at 4 weeks of age) with selective  $\text{ET}_A$  antagonist, ambrisentan or combined  $\text{ET}_{A/B}$  antagonist, A-182086, HbAA mice.** Panel A depicts representative Masson's trichrome stained sections of glomeruli. Original magnification, x40 (scale bar=50  $\mu\text{m}$ ). Panel B depicts quantification of panel A represented as sclerosis index score. Panel C depicts glomerular size represented as mean area of glomeruli [ $\mu\text{m}^2$ ]. Panel D depicts number of glomeruli per  $\text{mm}^2$ . Panel E depicts representative hematoxylin and eosin (H&E) stained sections of glomeruli. Original magnification, x40 (scale bar=50  $\mu\text{m}$ ). Panel F depicts glomerular vascular congestion represented as percentage of glomeruli with congestion. Panel G depicts basement membrane of Bowman's capsule thickening score. All the glomerular characteristics were counted in 10 sections per slide (minimum 20 glomeruli). Data are mean  $\pm$  S.E.M; n=5 in HbAA groups.

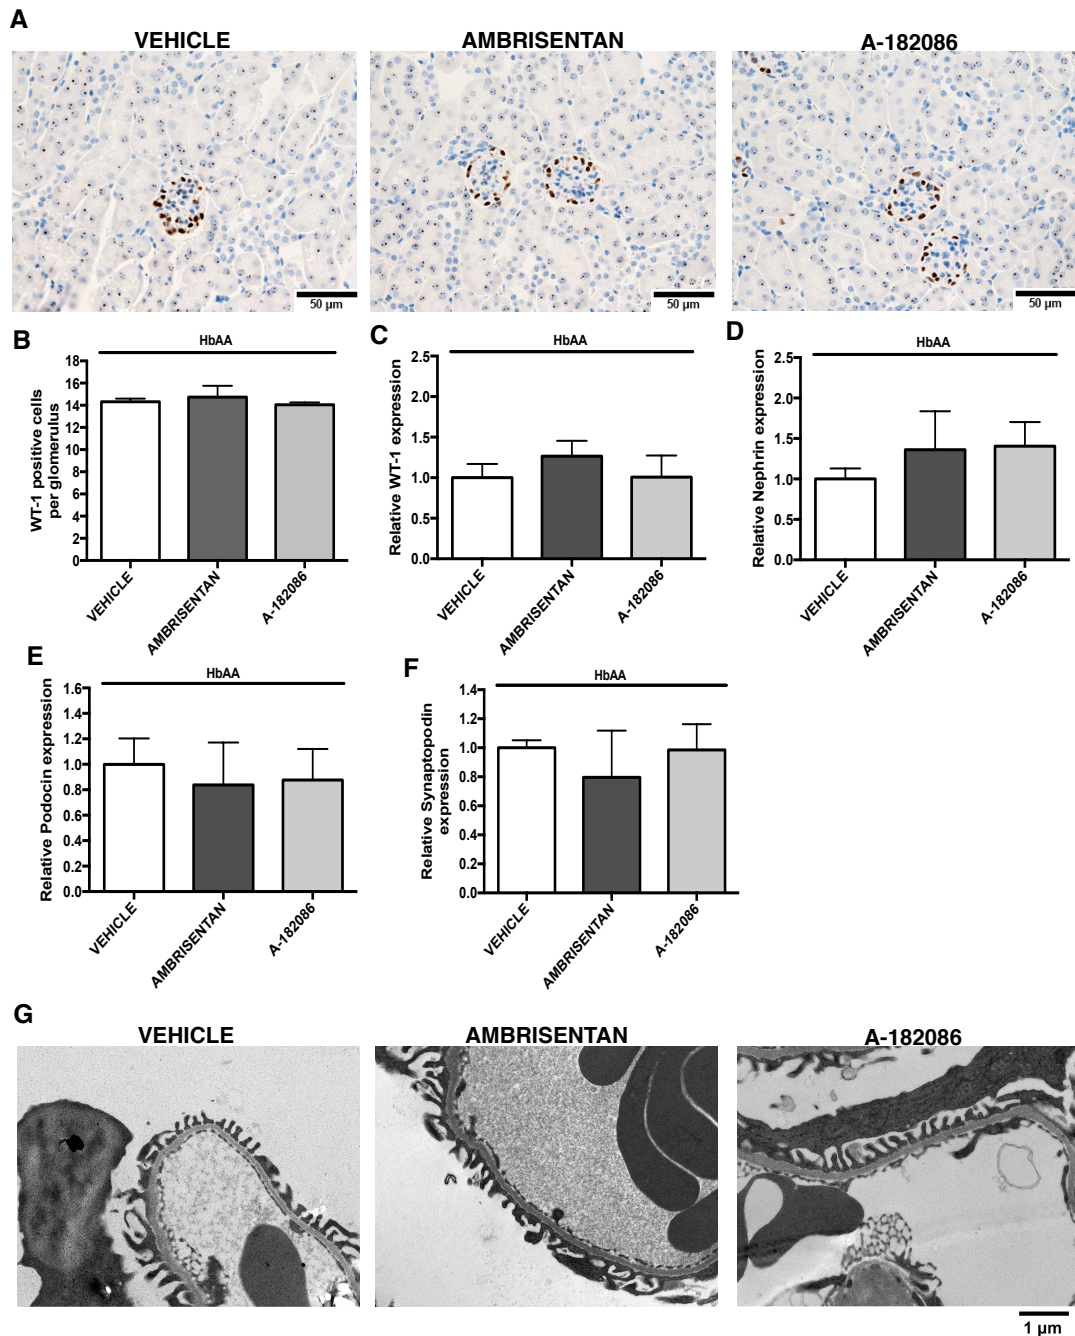

**Figure 3. Immunohistochemical examination and mRNA expression of markers of podocyte injury in vehicle-treated or treated with 10-week treatment protocol (beginning at 4 weeks of age) with selective  $ET_A$  antagonist, ambrisentan or combined  $ET_{A/B}$  antagonist, A-182086, HbAA mice.** Panel A depicts representative Wilm's tumor antigen 1 (WT-1) positive stained sections of glomeruli. Original magnification,  $\times 40$  (scale bar=50  $\mu m$ ). Panel B depicts the quantification of panel A represented as the average number of WT-1 positive cells per glomerulus. Podocytes were counted in minimum 20 glomeruli in 10 sections per slide. Data are mean  $\pm$  S.E.M;  $n=5$  in HbAA groups. Panel C depicts the relative WT-1 mRNA expression in glomeruli after 10-week treatment protocol. Panel D depicts the relative nephrin mRNA expression in glomeruli after 10-week treatment protocol. Panel E depicts the relative podocin mRNA expression in glomeruli after 10-week treatment protocol. Panel F depicts the relative synaptopodin mRNA expression in glomeruli after 10-week treatment protocol. Panel G depicts representative photomicrographs of transmission electron microscopy sections of glomeruli. Data are mean  $\pm$  S.E.M;  $n=5-6$  in HbAA groups.

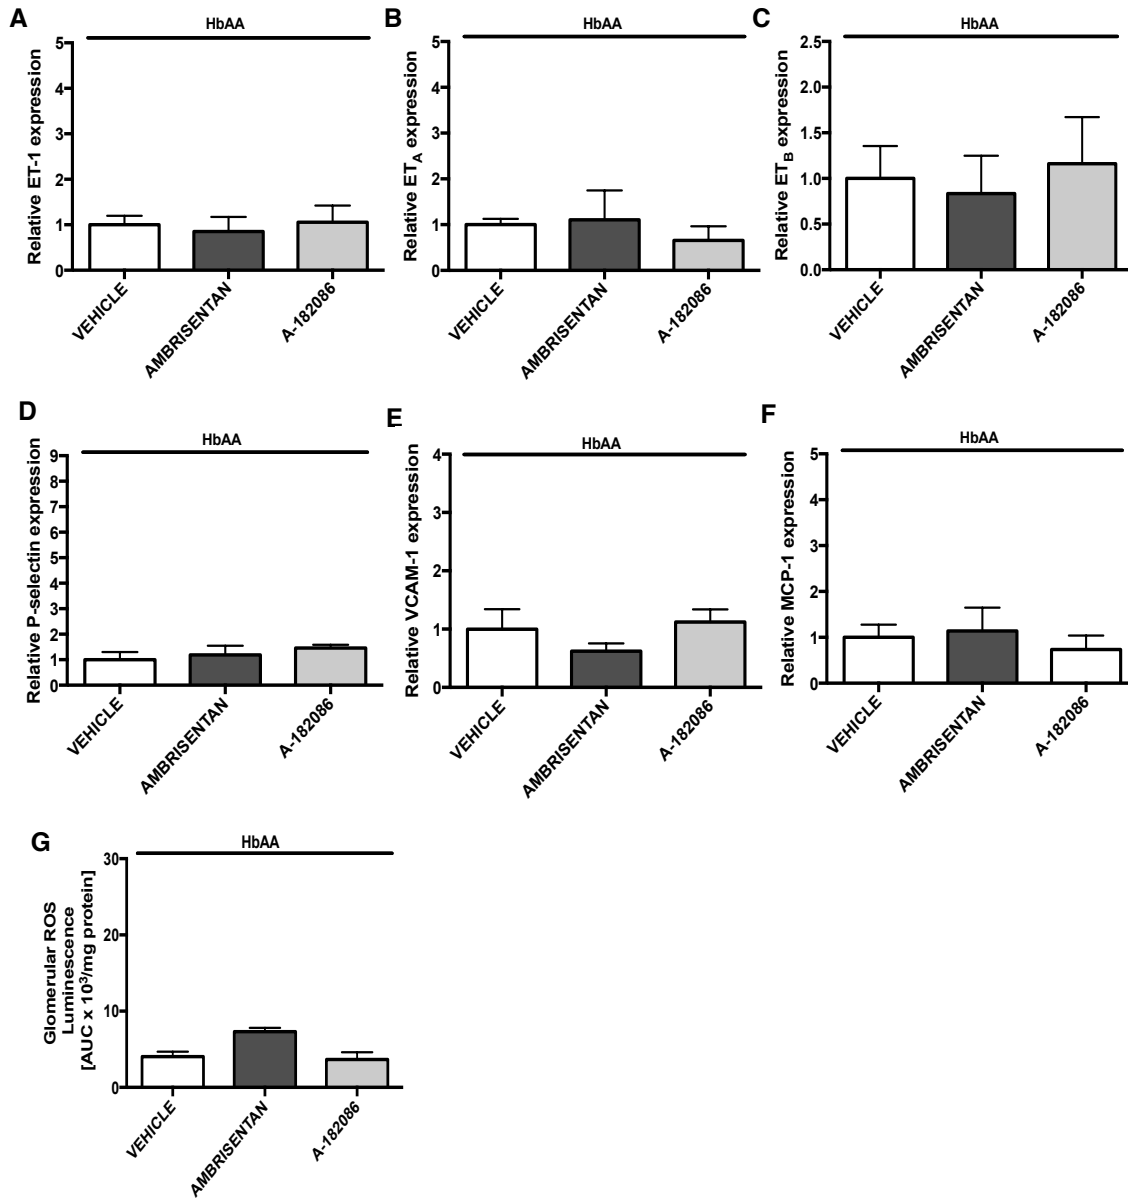

**Figure 4. Examination of ET signaling, endothelial dysfunction, inflammation and oxidative stress in glomeruli of vehicle-treated or treated with 10-week treatment protocol (beginning at 4 weeks of age) with selective ET<sub>A</sub> antagonist, ambrisentan or combined ET<sub>A/B</sub> antagonist, A-182086, HbAA mice.** Panel A depicts the relative ET-1 mRNA expression in glomeruli after 10-week treatment protocol. Panel B depicts the relative ET<sub>A</sub> receptor mRNA expression in glomeruli after 10-week treatment protocol. Panel C depicts the relative ET<sub>B</sub> receptor mRNA expression in glomeruli after 10-week treatment protocol. Panel D depicts the relative P-selectin mRNA expression in glomeruli after 10-week treatment protocol. Panel E depicts the relative vascular cell adhesion molecule 1 (VCAM-1) mRNA expression in glomeruli after 10-week treatment protocol. Panel F depicts the relative monocyte chemoattractant protein-1 (MCP-1) mRNA expression in glomeruli after 10-week treatment protocol. Panel G depicts the glomerular reactive oxygen species (ROS) production after 10-week treatment protocol. Data are mean ± S.E.M; n=5-6 in HbAA groups.

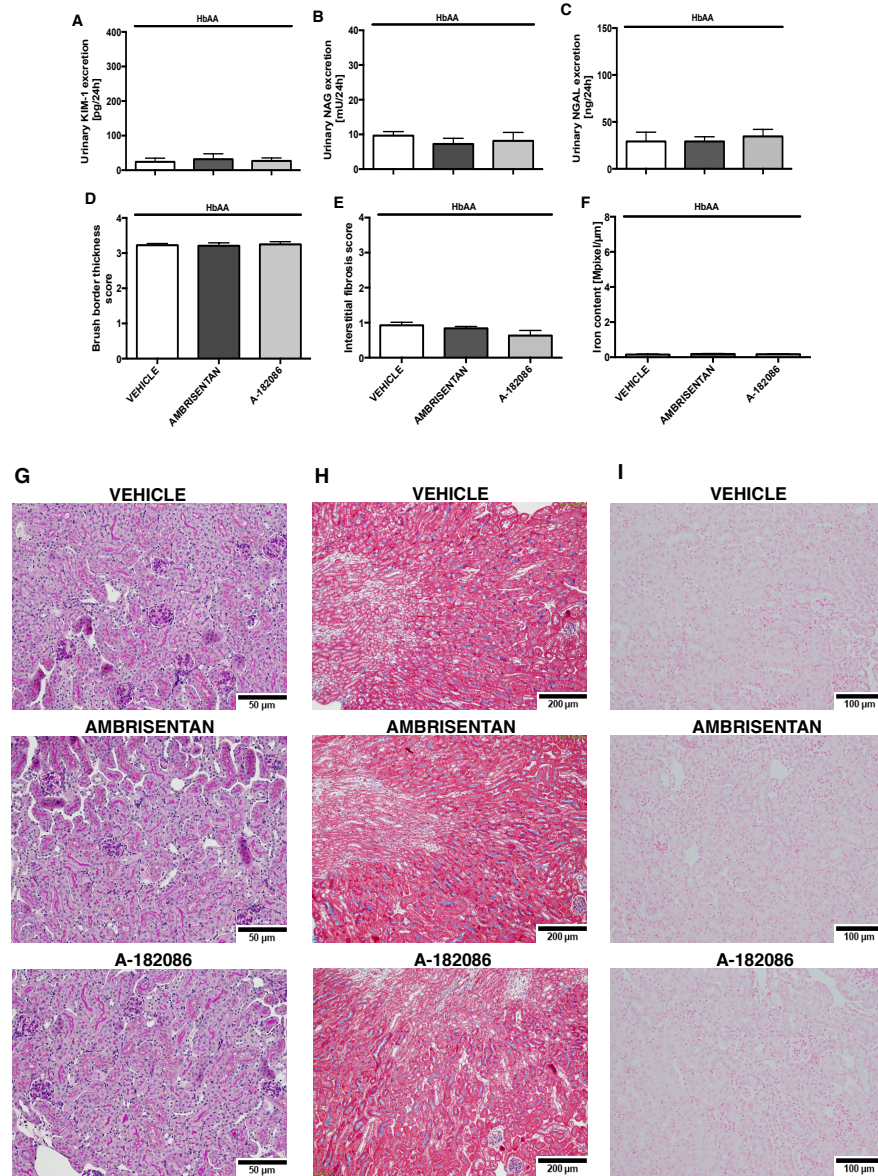

**Figure 5. Histological examination of the renal cortex and urinary excretion of markers of tubular injury in vehicle-treated or treated with 10-week treatment protocol (beginning at 4 weeks of age) with selective ET<sub>A</sub> antagonist, ambrisentan or combined ET<sub>A/B</sub> antagonist, A-182086, HbAA mice.** Panel A depicts the average urinary kidney injury marker 1 (KIM-1) excretion after 10-week treatment protocol. Panel B depicts the average urinary N-acetyl- $\beta$ -D-glucosaminidase (NAG) after 10-week treatment protocol. Panel C depicts the average urinary neutrophil gelatinase-associated lipocalin (NGAL) excretion, iron-binding protein, after 10-week treatment protocol. Data are mean  $\pm$  S.E.M; n=6-9 in HbAA groups. Panel D depicts brush border thickness index score. Panel E depicts interstitial fibrosis index score. Panel F depicts iron deposition in the whole kidney sections (Mpixel/ $\mu$ m). Panel G depicts representative periodic acid Schiff-hematoxylin (PASH) stained sections of tubules. Original magnification, x20 (scale bar=50  $\mu$ m). Panel H representative Masson's trichrome stained sections of renal cortex and medulla. Original magnification, x10 (scale bar=200  $\mu$ m, respectively). Panel I depicts Prussian blue iron stained sections of renal cortex. Original magnification, x20 (scale bar=100  $\mu$ m). Fibrosis and brush border thickness were assessed in 10 sections per slide and calculated. Data are mean  $\pm$  S.E.M; n=5 in HbAA groups.

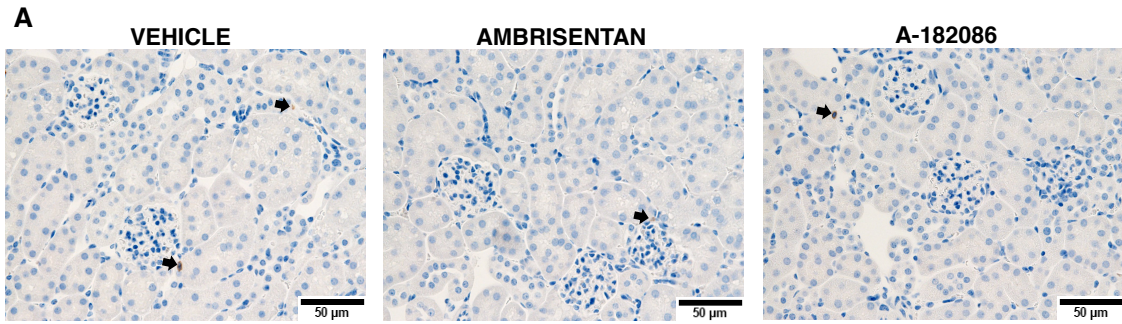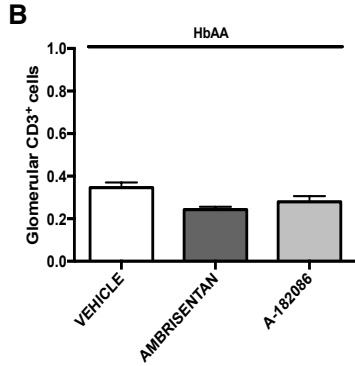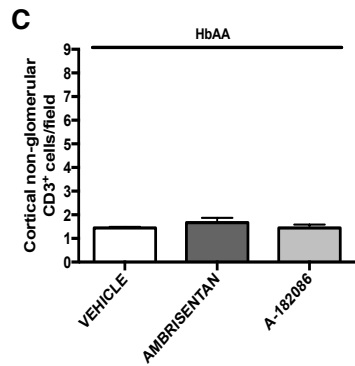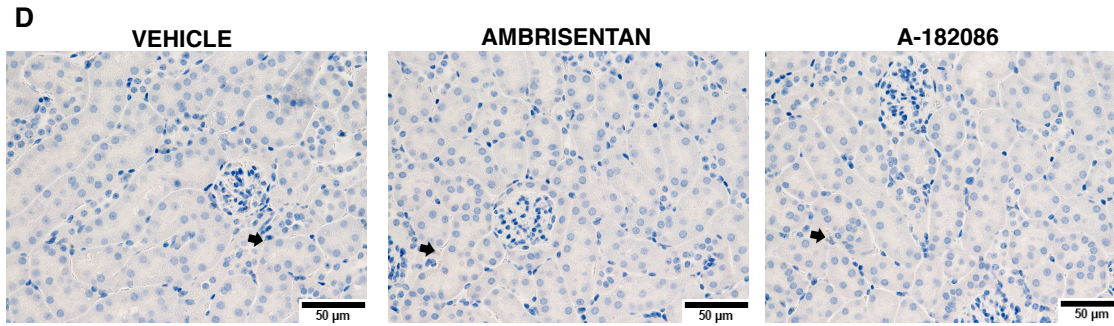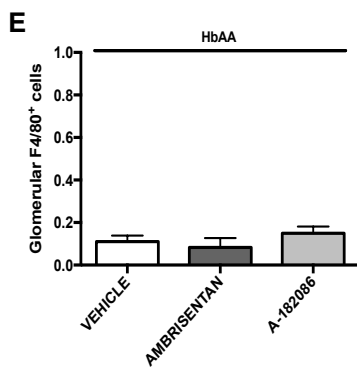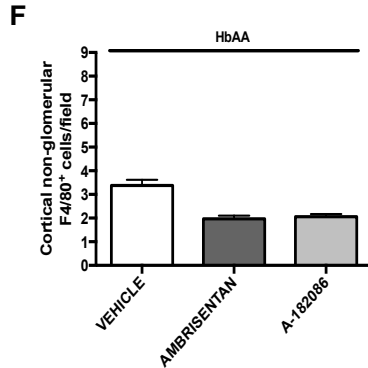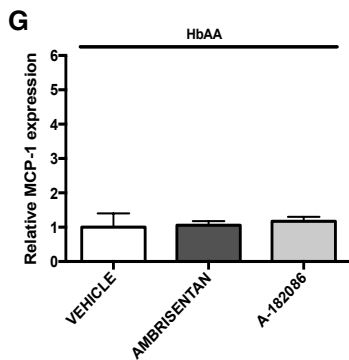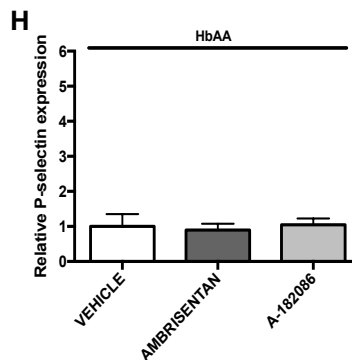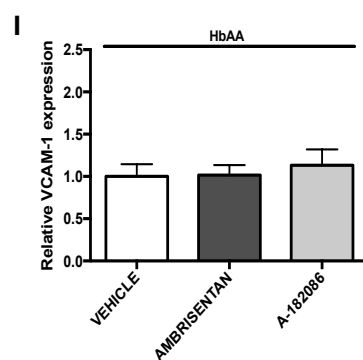

**Figure 6. Immunohistochemical examination and mRNA expression of proinflammatory and profibrotic markers in renal cortex in vehicle-treated or treated with 10-week treatment protocol (beginning at 4 weeks of age) with selective ET<sub>A</sub> antagonist, ambrisentan or combined ET<sub>A/B</sub> antagonist, A-182086, HbAA mice.** Panel A depicts representative CD3<sup>+</sup> stained cortical sections. Original magnification, x40 (scale bar=50 μm). Arrows indicate CD3<sup>+</sup> cells. Panel B depicts the quantification of glomerular CD3<sup>+</sup> represented as the average number of CD3<sup>+</sup> cells per glomerulus (minimum 20 glomeruli counted). Panel C depicts the quantification of cortical non-glomerular CD3<sup>+</sup> represented as the average number of non-glomerular CD3<sup>+</sup> cells per field. Panel D depicts representative F4/80<sup>+</sup> stained cortical sections. Original magnification, x40 (scale bar=50 μm). Arrows indicate F4/80<sup>+</sup> cells. Panel E depicts the quantification of glomerular F4/80<sup>+</sup> cells represented as the average number of glomerular F4/80<sup>+</sup> cells per glomerulus (minimum 20 glomeruli counted). Panel F depicts the quantification of cortical non-glomerular F4/80<sup>+</sup> cells represented as the average number of non-glomerular F4/80<sup>+</sup> cells per field. CD3<sup>+</sup> and F4/80<sup>+</sup> cells were assessed in 10 sections per slide. Data are mean ± S.E.M; n=5 in HbAA groups. Panel G depicts the relative MCP-1 mRNA expression in cortex after 10-week treatment protocol. Panel H depicts the relative P-selectin mRNA expression in cortex after 10-week treatment protocol. Panel I depicts the relative VCAM-1 mRNA expression in cortex after 10-week treatment protocol. Data are mean ± S.E.M; n=5-6 in HbAA groups; \*p<0.05 versus vehicle-treated HbAA.

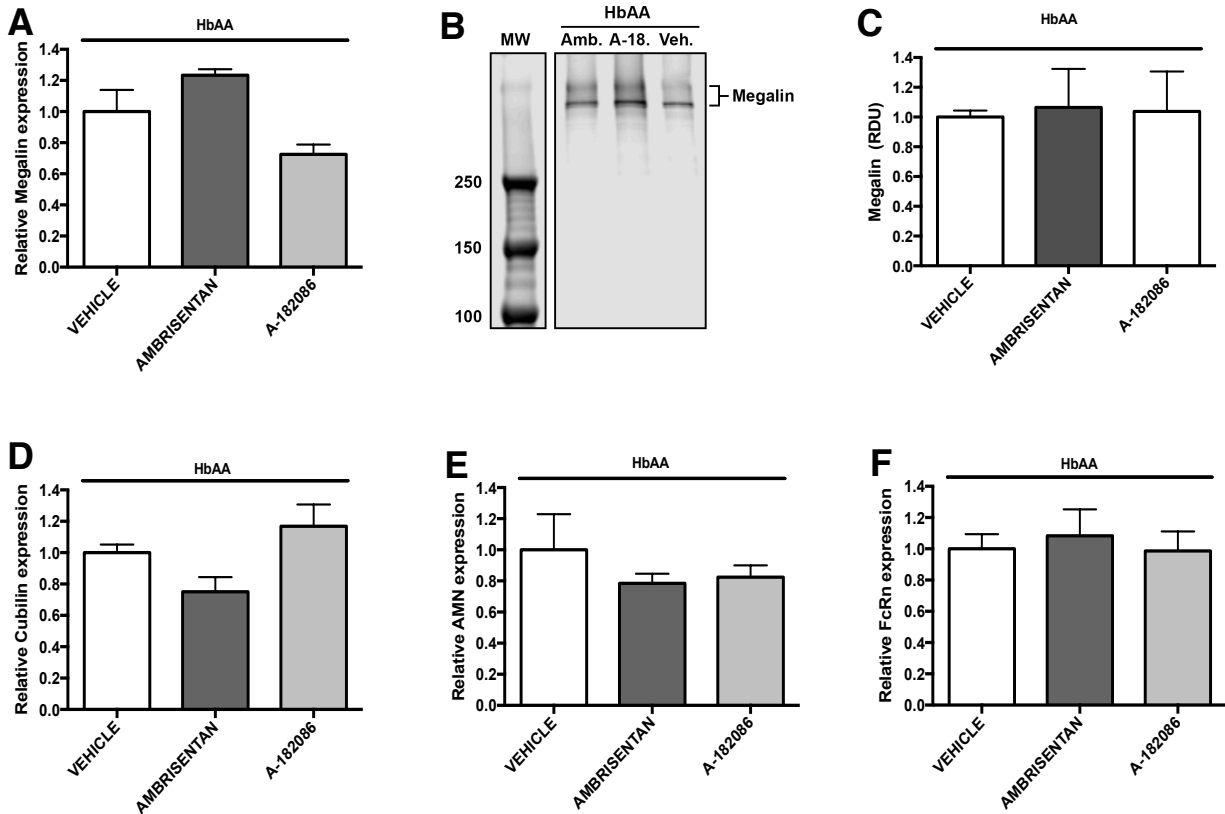

**Figure 7. Examination of mRNA expression of proximal tubule albumin handling receptors in cortex of vehicle-treated or treated with 10-week treatment protocol (beginning at 4 weeks of age) with selective ET<sub>A</sub> antagonist, ambrisentan or combined ET<sub>A/B</sub> antagonist, A-182086, HbAA mice.** Panel A depicts the relative megalin mRNA expression in cortex after 10-week treatment protocol. Panel B depicts Western blot analysis of megalin expression in cortical extracts. Panel C depicts quantification of Western blot bands for megalin. Panel D depicts the relative cubilin mRNA expression in cortex after 10-week treatment protocol. Panel E depicts the relative amnionless (AMN) receptor mRNA expression in cortex after 10-week treatment protocol. Panel F depicts the relative neonatal Fc receptor (FcRn) mRNA expression in cortex after 10-week treatment protocol. Data are mean ± S.E.M; n=5-6 in HbAA groups.
